# Supplementary material for: Adsorption and oxidation of ethanol on colloid-based Pt/C, PtRu/C and Pt3Sn/C catalysts: In situ FTIR spectroscopy and on-line DEMS studies
Source: Royal Society of Chemistry journal article supplement (doi:10.1039/b700676b), 2007-01-01
Supplement: b700676b.pdf [file b700676b.pdf]

## Supporting Material

### **Adsorption and oxidation of ethanol on colloid-based Pt/C, PtRu/C and Pt<sub>3</sub>Sn/C catalysts: *In-situ* FTIR spectroscopy and on-line DEMS studies**

Q. Wang<sup>a</sup>, G.Q. Sun<sup>a\*</sup>, L.H. Jiang<sup>a,b</sup>, Q. Xin<sup>a</sup>,

S.G. Sun<sup>c\*</sup>, Y.X. Jiang<sup>c</sup>, S.P. Chen<sup>c</sup>, Z. Jusys<sup>b</sup>, R.J. Behm<sup>b\*</sup>

<sup>a</sup> *Dalian Institute of Chemical Physics, Chinese Academy of Sciences, Dalian, 116023,  
Graduate School of the Chinese Academy of Sciences, Beijing, 100039, China*

<sup>b</sup> *Institute of Surface Chemistry and Catalysis, Ulm University, D-89069 Ulm, Germany*

<sup>c</sup> *State Key Laboratory for Physical Chemistry of Solid Surfaces, Department of Chemistry,  
Xiamen University, Xiamen, 361005, China*

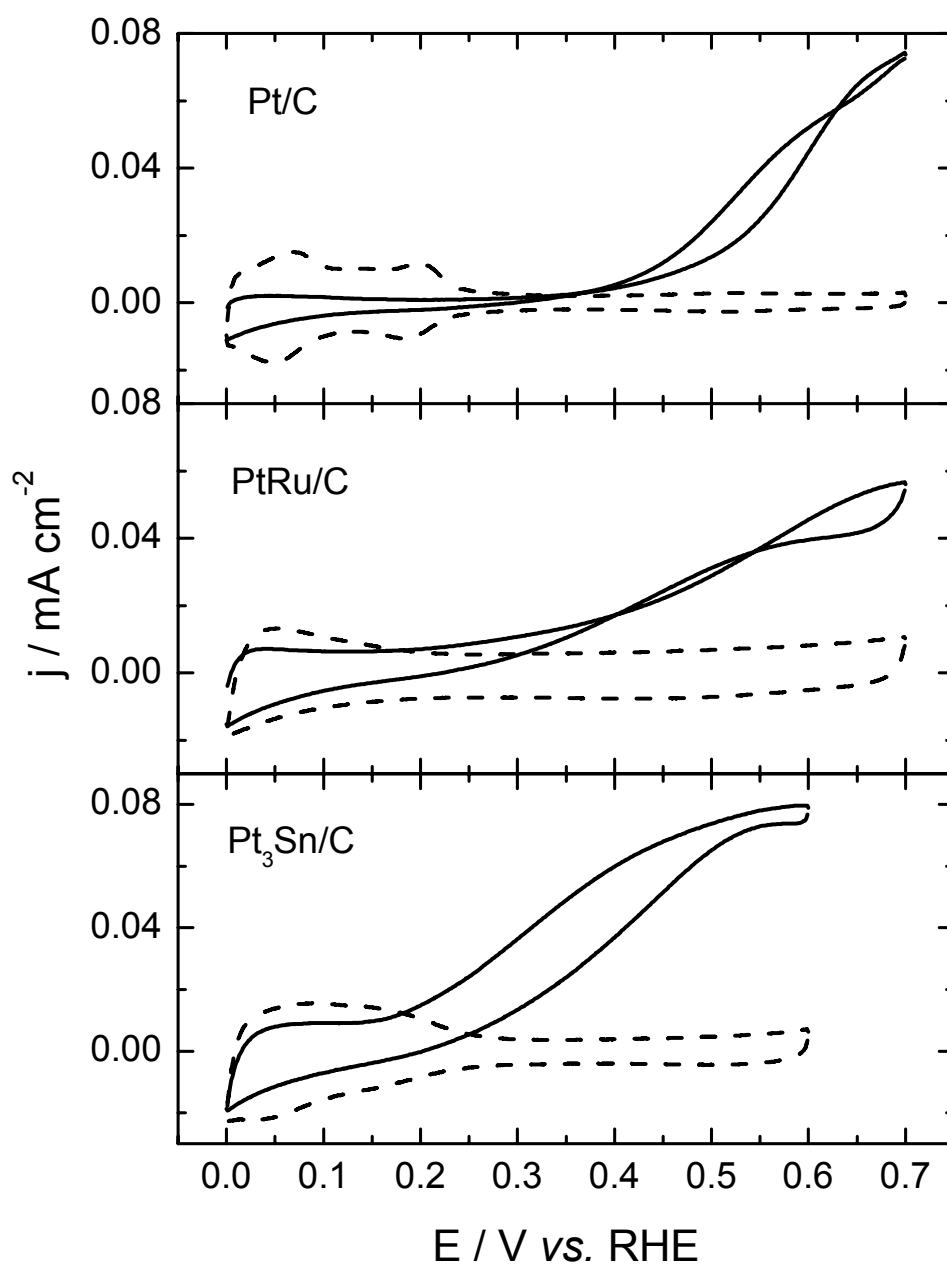

Fig. S1 Potentiodynamic ethanol electrooxidation on (a) Pt/C, (b) PtRu/C, and (c) Pt<sub>3</sub>Sn/C catalysts in 0.1 M H<sub>2</sub>SO<sub>4</sub> (---) and 0.1 M H<sub>2</sub>SO<sub>4</sub> + 0.1 M C<sub>2</sub>H<sub>5</sub>OH (—) solution (scan rate 10 mV s<sup>-1</sup>, catalyst loading: 86 μg cm<sup>-2</sup>).

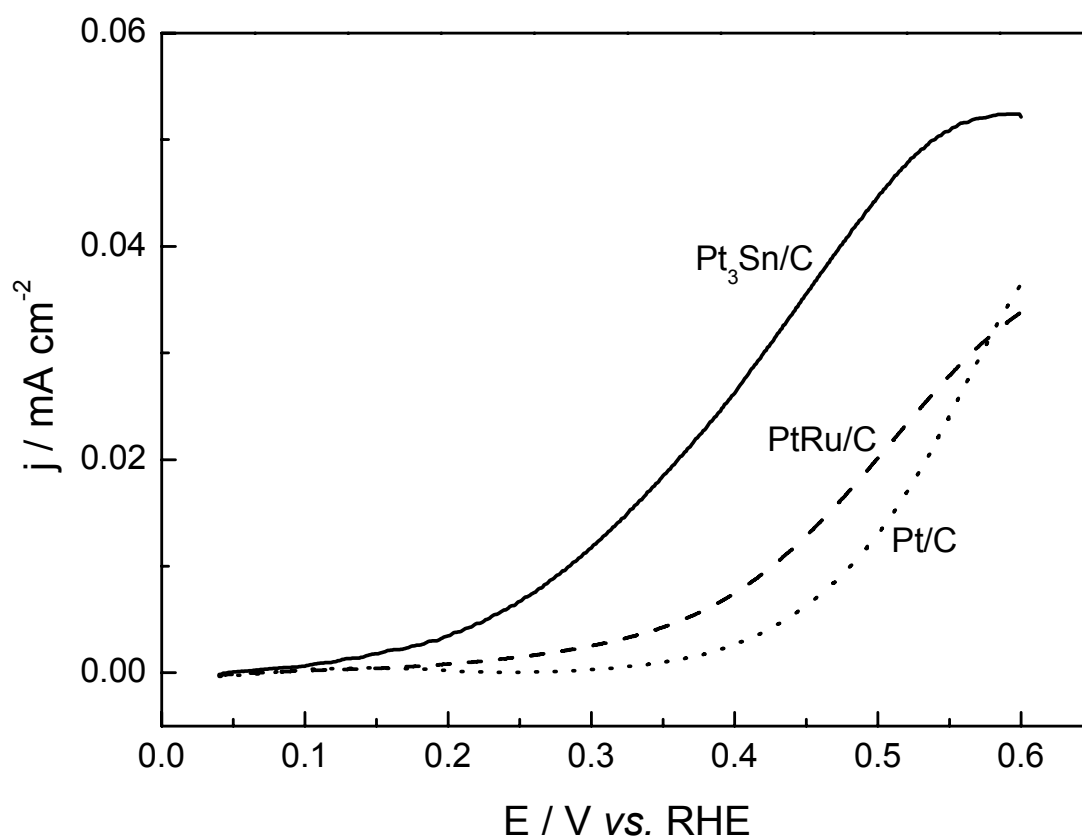

Fig. S2 Polarization curves for ethanol electrooxidation on (a) Pt/C, (b) PtRu/C, and (c) Pt<sub>3</sub>Sn/C catalysts in 0.1 M H<sub>2</sub>SO<sub>4</sub> + 0.1 M C<sub>2</sub>H<sub>5</sub>OH at a scan rate of 1 mV s<sup>-1</sup> (catalyst loading: 86 μg cm<sup>-2</sup>).
